# Supplementary material for: Endogenous TLR2 ligand embedded in the catalytic region of human cysteinyl-tRNA synthetase 1
Source: PubMed Central journal article supplement — J Immunother Cancer. 2020 May 26;8(1):e000277. doi: 10.1136/jitc-2019-000277 (PMC7254149; doi:10.1136/jitc-2019-000277), 2020-05-26
Supplement: jitc-2019-000277supp001.pdf [file jitc-2019-000277supp001.pdf]

Figure S1

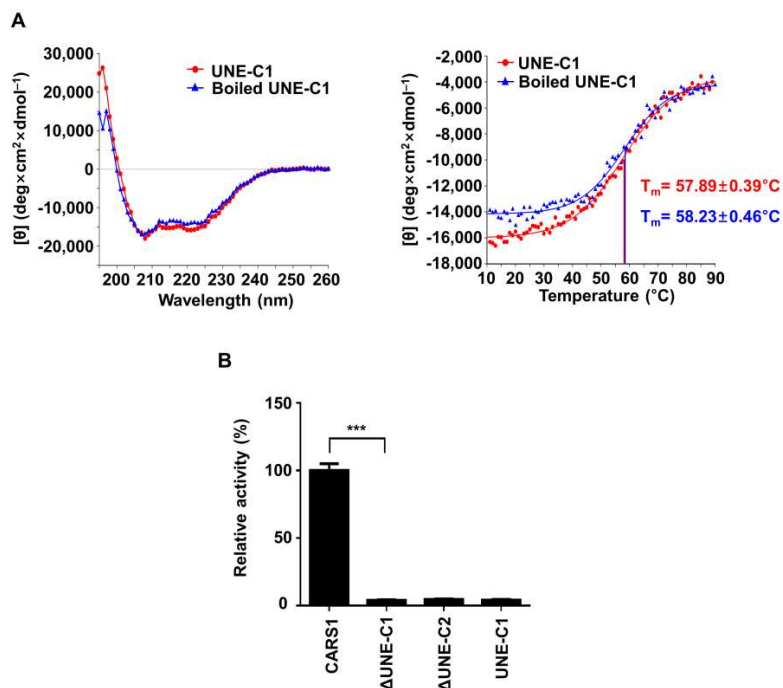

1

2 **Figure S1 UNE-C1 has an unusual thermostability and involves in protein**  
 3 **translation** (A) Far-UV Circular dichroism (CD) spectroscopy analysis of UNE-C1  
 4 and boiled UNE-C1 at 195-260 nm wavelength. Thermal unfolding CD spectra and  
 5 melting temperature ( $T_m$ ) of UNE-C1 and boiled UNE-C1 at 222 nm wavelength. The  
 6 CD spectra of UNE-C1 and boiled UNE-C1 are shown in red and blue colors,  
 7 respectively. The CD spectra were measured in triplicate. (B) The enzymatic activity  
 8 of CARS1 fragments was determined. 100 nM of each protein was incubated with  
 9 reaction mixtures for 10 minutes and aminoacylated cysteine was quantified. The  
 10 enzymatic activities are expressed as the relative percentage compared with full-  
 11 length CARS1. Results are presented as mean  $\pm$  SD and statistical significance was  
 12 analyzed with student's t-test (\*\*\*) p < 0.001).

1

Figure S2

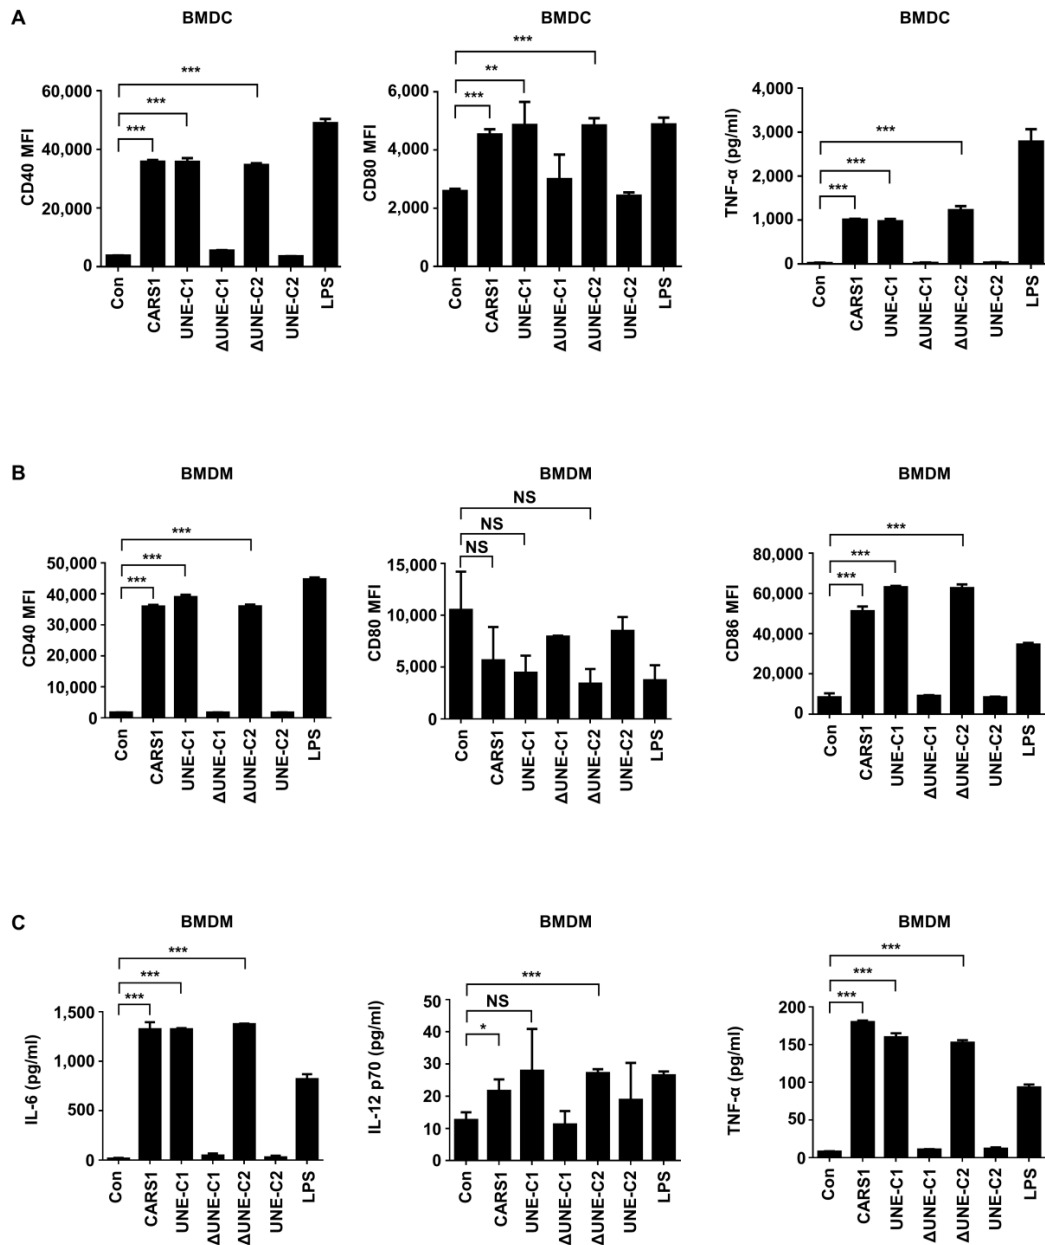

14 **Figure S2 UNE-C1 induces functional activation of APCs** (A) *in vitro* generated  
15 BMDCs were treated with UNE-C1 for 24 h. Co-stimulatory molecules were analyzed  
16 from the gated CD11c<sup>+</sup> population. The expression levels of CD40 and CD80 were  
17 evaluated by flow cytometry and the secretion level of TNF- $\alpha$  in the supernatants  
18 were quantified by ELISA. (B, C) *In vitro* generated BMDMs were treated with  
19 different fragments of CARS1 for 24 h. Co-stimulatory molecules were analyzed from  
20 the gated CD11b<sup>+</sup> F4/80<sup>+</sup> population. The expression levels of CD40, CD80, and  
21 CD86 (B) were evaluated by flow cytometry and the secretion levels of IL-6, IL-  
22 12p70, and TNF- $\alpha$  (C) were measured by ELISA. Results are presented as mean  $\pm$   
23 SD and statistical significance was analyzed with student's t-test (\* p < 0.05, \*\* p  
24 <0.01, \*\*\* p < 0.001).

25

Figure S3

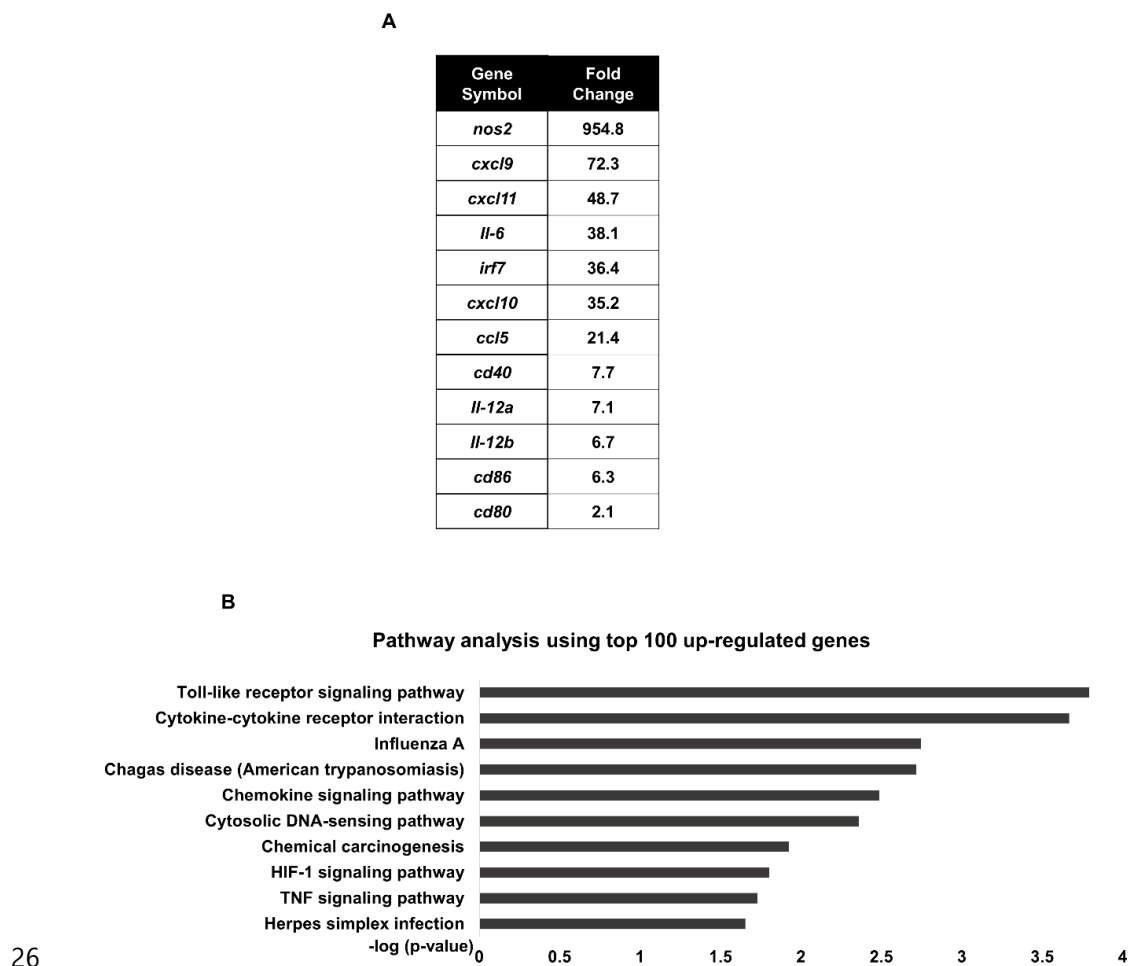

26

27 **Figure S3 UNE-C1 stimulates the functional activation of APCs via TLR2/TLR6**

28 (A, B) RNA-sequencing was conducted to assess UNE-C1 mediated immune

29 responses. Demonstration of genes related to pro-inflammation or involved in TLR

30 signaling pathways (A). Analysis of KEGG pathways generated from top 100 genes

31 up-regulated by UNE-C1 treatment (B).

32

Figure S4

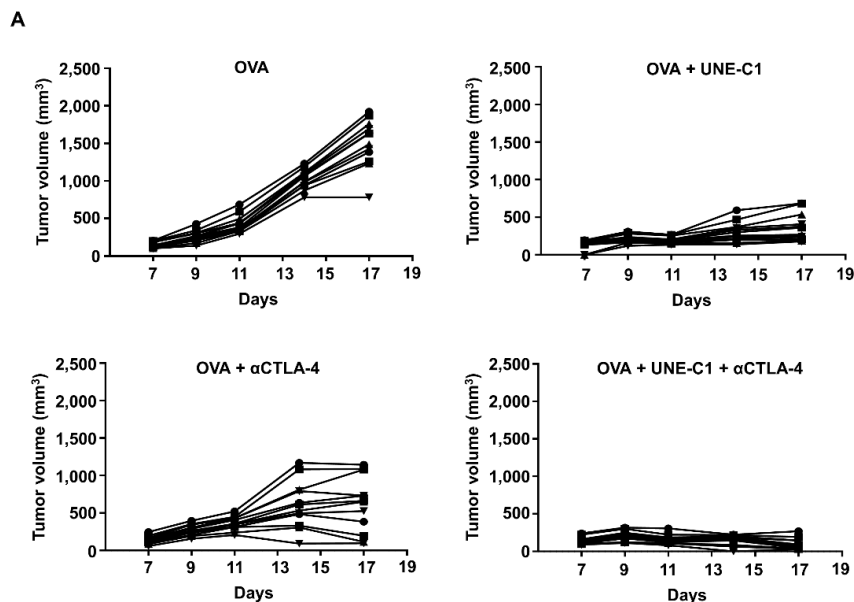

33

34

**Figure S4 Combination therapy of anti-CTLA-4 antibody and UNE-C1**

35

**immunization induces further tumor regression (A)** C57BL/6 mice were

36

implanted with  $1 \times 10^6$  of E.G7-OVA cells. OVA + UNE-C1 were injected s.c. on days

37

3 and 10. Anti-CTLA-4 antibody was injected i.p. on day 3, 6, 9, 12, and 15 to check

38

the synergy effect. Individual tumor growth curves of OVA, OVA + UNE-C1, OVA +

39

αCTLA-4, and OVA + UNE-C1 + αCTLA-4 groups are shown.

40

41

42

43

44

45

## 46 **Supplementary Methods**

### 47 **Cell culture**

48 HCT116, THP-1, Daudi, and Jurkat cells were cultivated in RPMI media containing  
49 10% fetal bovine serum (FBS) and 50 µg/ml of streptomycin and penicillin.  
50 RAW264.7 cells were grown in DMEM media with the same supplements as  
51 described above. THP-1 cells were differentiated using 50 ng/ml of PMA (Sigma-  
52 Aldrich). Primary cells (BMDCs and BMDMs) were obtained from female C57BL/6  
53 mice and cultured in RPMI complete media. GM-CSF (R&D Systems) or M-CSF  
54 (R&D Systems) were used for obtaining BMDCs and BMDMs.

### 55 **Protein purification**

56 Plasmids containing different sizes of CARS1 were constructed in the pET-28a  
57 vector containing N, and C-terminal 6X his tag. All constructs were transformed into  
58 BL21-codon plus-RIPL cells, and colonies were further used for inoculation. A large  
59 scale of cells was grown in LB until OD 600 reaches 0.5, and protein expression was  
60 induced using 0.5 mM of IPTG (EMD Millipore) for 16 h at 4 °C. Cell pellets were  
61 obtained from centrifugation and disrupted by sonication with Tris buffer containing  
62 300 mM NaCl. After obtaining supernatant from centrifugation at 20,000 *g* for 30 min,  
63 it was poured over a column containing Ni-NTA resin (Thermo Fisher Scientific). The  
64 washing step was performed with 50 mM Tris, pH7.5, containing 300 mM NaCl, 5 %  
65 glycerol, and 15 mM imidazole. After eluting proteins with 10 ml of elution buffer (50  
66 mM Tris pH 7.5, 300 mM NaCl, Glycerol 5%, 300 mM imidazole), endotoxin was

67 removed using Triton X-114 (Sigma-Aldrich). Qualified proteins below 0.04 EU/mg  
68 from LAL assay (Thermo Fisher Scientific) were used for all experiments.

## 69 **ELISA**

70 RAW264.7, PMA-differentiated THP-1, BMDC, and BMDC cells were seeded at  $5 \times$   
71  $10^5$  cells/ml in 24 well plates for O/N, and the medium was changed into serum-free  
72 media for 2 h before the treatment. In the case of RAW264.7 and PMA-differentiated  
73 THP-1, 100 nM of proteins were treated for 4 h. PMA-differentiated THP-1 cells were  
74 pre-incubated with anti-TLR2 (Invivogen) or anti-TLR4 (Invivogen) for an hour before  
75 treating CARS1 or UNE-C1. To rule out LPS contamination, CARS1 or UNE-C1 was  
76 pre-treated with proteinase K (Thermo Fisher Scientific) or boiled for an hour. Before  
77 treating proteins, some cells were pre-incubated with polymyxin B (Sigma-Aldrich)  
78 for an hour. For primary cells, the same molar concentration of proteins was  
79 incubated for 24 h. Supernatants were obtained from centrifugation at 500 g for 10  
80 min and subjected for ELISA using mouse IL-6, TNF- $\alpha$ , and IL-12p70 ELISA set  
81 (BD).

## 82 **Circular dichroism (CD) spectroscopy**

83 CD spectroscopy was used to investigate thermal stability of UNE-C1. To compare  
84 structural conformation of UNE-C1 and boiled UNE-C1, the samples in 20 mM Tris-  
85 HCl (pH 7.5), 100 mM NaCl, and 1 mM DTT were subjected to far-UV CD  
86 measurements at 20 °C using a 1-mm path length quartz cuvette in a Jasco J-815  
87 CD spectrometer (Jasco, Tokyo, Japan). CD spectra were acquired over the  
88 wavelength range of 195–260 nm with 1.0 nm bandwidth and converted into mean

89 residue ellipticity (degree  $\text{cm}^2 \text{dmol}^{-1}$ ). Blank spectra obtained using buffer without  
90 protein were subtracted. The thermal unfolding spectra of the UNE-C1 and boiled  
91 UNE-C1 were monitored at 222 nm wavelength using the same settings as  
92 described above. The samples were heated from 10 °C to 90 °C at a rate of 1°C min<sup>-1</sup>.  
93 The melting temperatures ( $T_m$ ) were determined from a nonlinear regression  
94 model (Sigmoidal, Sigmoid, 4 Parameter; SigmaPlot 10.0.0.54). The CD spectra were  
95 measured in triplicate.

### 96 **Aminoacylation activity**

97 Full-length CARS1 and its fragments, including  $\Delta$ UNE-C1,  $\Delta$ UNE-C2, and UNE-C1  
98 were tested for aminoacylation. The assay was carried out in a buffer containing 50  
99 mM HEPES (pH 7.6), 20 mM KCl, 10 mM  $\text{MgCl}_2$ , 4 mM DTT, 5 mM ATP, 5 mg/ml  
100 yeast extractant total tRNA, 60 Ci/mmol [<sup>35</sup>S] Labeled L-Cysteine (PerkinElmer), and  
101 100 nM of different CARS1 fragments. The reaction was initiated by adding each  
102 enzyme into the reaction tube at 37 °C and the reaction samples were taken after 10  
103 minutes. Then, the reaction was quenched by 5 % trichloroacetic acid (TCA) on  
104 Whatman filter pads. After the pads were washed with pre-cooled 5 % TCA and 95  
105 % ethanol, aminoacylated cysteine was quantified using a scintillation counter  
106 (Perkin Elmer).

### 107 **RNA isolation and sequencing**

108 BMDCs were treated with UNE-C1 for 24 h before RNA isolation. Total RNA was  
109 isolated using Trizol reagent (Invitrogen) and quality was assessed by Agilent 2100  
110 bioanalyzer using the RNA 6000 Nano Chip (Agilent Technologies, Amstelveen, The



111 Netherlands). Quantification of RNA was performed using ND-2000  
112 Spectrophotometer (Thermo Inc., DE, USA). For control and UNE-C1 RNAs, the  
113 construction of library was performed using QuantSeq 3' mRNA-Seq Library Prep Kit  
114 (Lexogen, Inc., Austria) according to the manufacturer's instructions. In brief, each  
115 500ng total RNA were prepared and an oligo-dT primer containing an Illumina-  
116 compatible sequence at its 5' end was hybridized to the RNA and reverse  
117 transcription was performed. After degradation of the RNA template, second strand  
118 synthesis was initiated by a random primer containing an Illumina-compatible linker  
119 sequence at its 5' end. The double-stranded library was purified by using magnetic  
120 beads to remove all reaction components. The library was amplified to add the  
121 complete adapter sequences required for cluster generation. The finished library is  
122 purified from PCR components. High-throughput sequencing was performed as  
123 single-end 75 sequencing using NextSeq 500 (Illumina, Inc., USA).
